# Supplementary material for: Dietary Inhibitors of CYP3A4 Are Revealed Using Virtual Screening by Using a New Deep-Learning Classifier
Source: PubMed Central journal article supplement (PMC8895463; doi:10.1021/acs.jafc.2c00237), 2022-02-01
Supplement: jf2c00237_si_001.pdf [file jf2c00237_si_001.pdf]

## **Supporting Information**

### **Dietary inhibitors of CYP3A4 are revealed using virtual screening by using a new deep learning classifier**

Yelena Guttman, Zohar Kerem\*

Institute of Biochemistry, Food Science and Nutrition, The Robert H. Smith Faculty of Agriculture, Food and Environment, The Hebrew University of Jerusalem.

POB 12 Rehovot 76100, Israel

\*Correspondence to:

E-mail: [zohar.kerem@mail.huji.ac.il](mailto:zohar.kerem@mail.huji.ac.il)

Tel: 972-8-9489278;

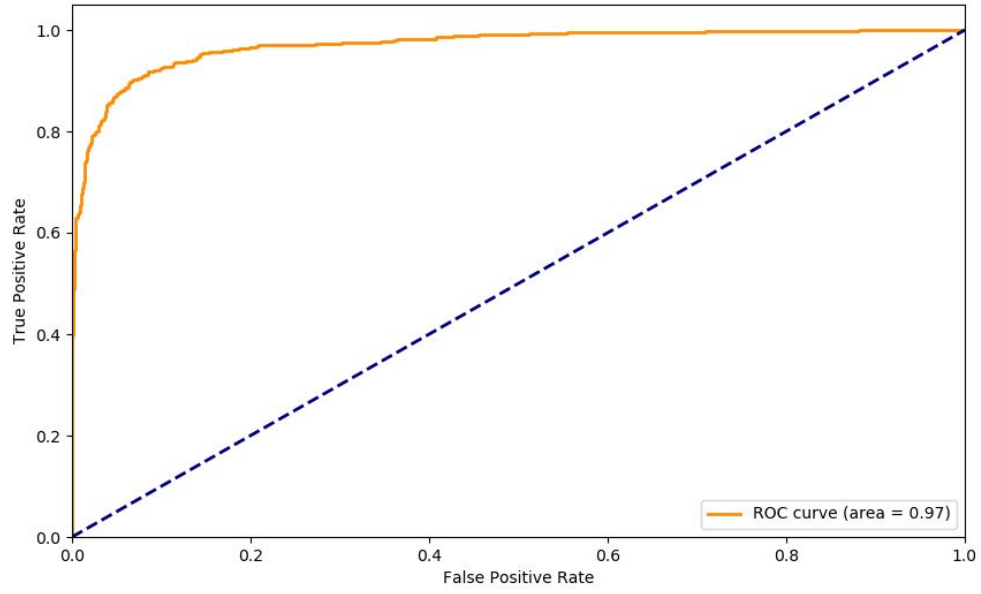

**Figure S1: Receiver-operating-characteristic (ROC) curve of the validation set.** The continuous and the dashed lines represent our classifier and a random classifier, respectively.

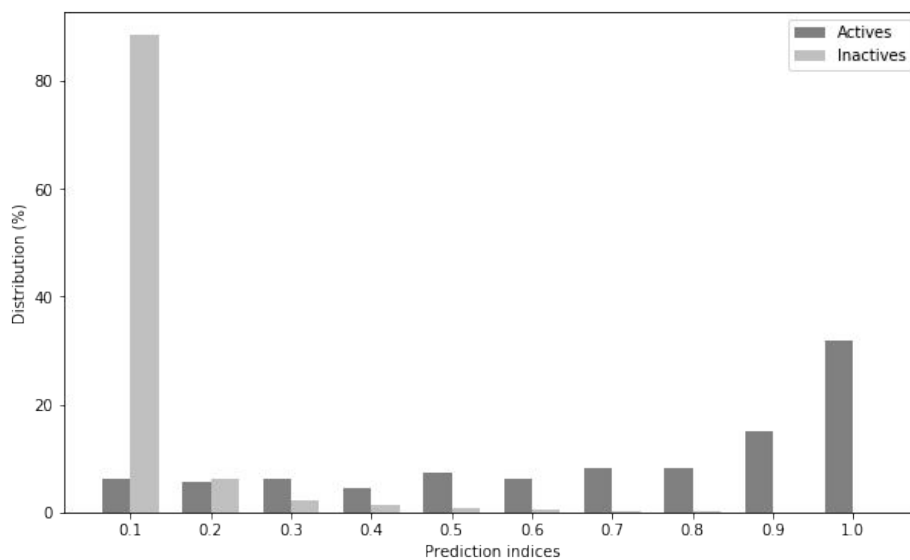

**Figure S2: Distribution of truly active and inactive compounds by prediction indices.** Compounds in the validation set were scored by the classifier. The scores (indices), in a range of 0-1, indicate the probability of a compound to be CYP3A4 inhibitors.

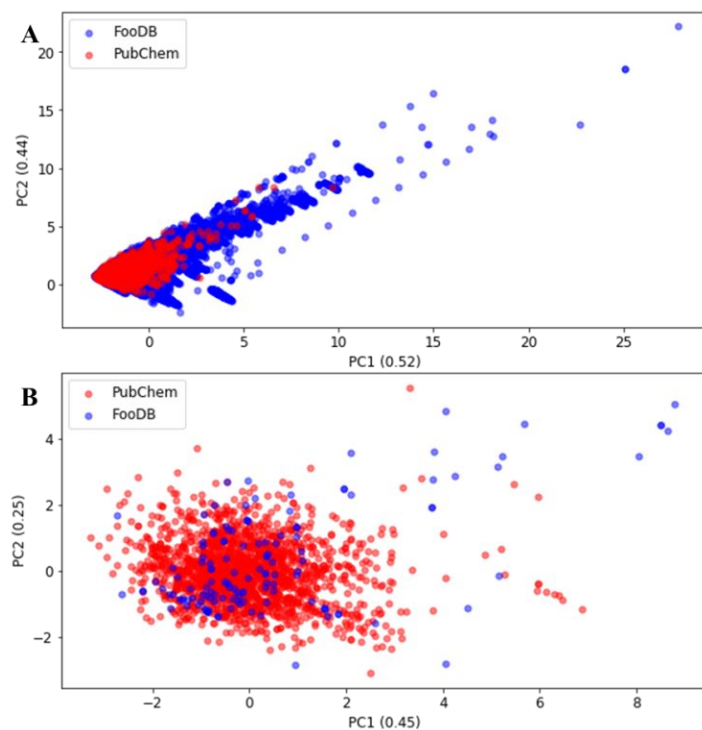

**Figure S3: 2D chemical space presented by the second principal component (PC) plotted against the first PC based on physicochemical descriptors. (A) All compounds used for model building (PubChem) and screening (FooDB). (B) Active compounds from PubChem and FooDB databases. The four descriptors of LRO5: molecular weight, lipophilicity (AlogP), number of H-bond donors, and number of H-bond acceptors were calculated using Canvas (Schrödinger, NY, USA). Principal components were calculated using the Scikit-learn package in Python 3.7.4. One outlier compound (PubChem SID 26748902) was omitted.**

**Table S1: Composition of training and validation sets**

|                  | Training set | Validation set | Total |
|------------------|--------------|----------------|-------|
| <b>Actives</b>   | 1350         | 410            | 1760  |
| <b>Inactives</b> | 6639         | 2254           | 8893  |
| <b>Total</b>     | 7989         | 2664           | 10653 |

**Table S2: Model performance with cut-offs at different indices.**

| Index      | TP         | FP          | TN       | FN       | MCC      | SE       | SP       | EF           | TP/FP       |
|------------|------------|-------------|----------|----------|----------|----------|----------|--------------|-------------|
| <b>0</b>   | <b>410</b> | <b>2254</b> | <b>0</b> | <b>0</b> | <b>0</b> | <b>1</b> | <b>0</b> | <b>0.932</b> | <b>0.18</b> |
| <b>0.1</b> | 384        | 260         | 1994     | 26       | 0.6921   | 0.9366   | 0.8847   | 3.609        | 1.48        |
| <b>0.2</b> | 361        | 121         | 2133     | 49       | 0.7750   | 0.8805   | 0.9463   | 4.533        | 2.98        |
| <b>0.3</b> | 335        | 72          | 2182     | 75       | 0.7875   | 0.8171   | 0.9680   | 4.982        | 4.65        |
| <b>0.4</b> | 316        | 44          | 2210     | 94       | 0.7930   | 0.7707   | 0.9805   | 5.313        | 7.18        |
| <b>0.5</b> | 286        | 29          | 2225     | 124      | 0.7652   | 0.6976   | 0.9871   | 5.500        | 9.86        |
| <b>0.6</b> | 260        | 15          | 2239     | 150      | 0.7442   | 0.6341   | 0.9933   | 5.723        | 17.33       |
| <b>0.7</b> | 226        | 7           | 2247     | 184      | 0.7001   | 0.5512   | 0.9969   | 5.871        | 32.29       |
| <b>0.8</b> | 192        | 2           | 2252     | 218      | 0.6491   | 0.4683   | 0.9991   | 5.990        | 96          |
| <b>0.9</b> | 130        | 1           | 2253     | 280      | 0.5284   | 0.3171   | 0.9996   | 6.007        | 130         |
| <b>1</b>   | 0          | 0           | 2254     | 410      | -        | 0        | 1        | -            | -           |
